# Supplementary material for: Rapid and sensitive detection of antibiotic resistance on a programmable digital microfluidic platform
Source: Royal Society of Chemistry journal article supplement (doi:10.1039/c5lc00462d), 2015-01-01
Supplement: c5lc00462d1.pdf [file c5lc00462d1.pdf]

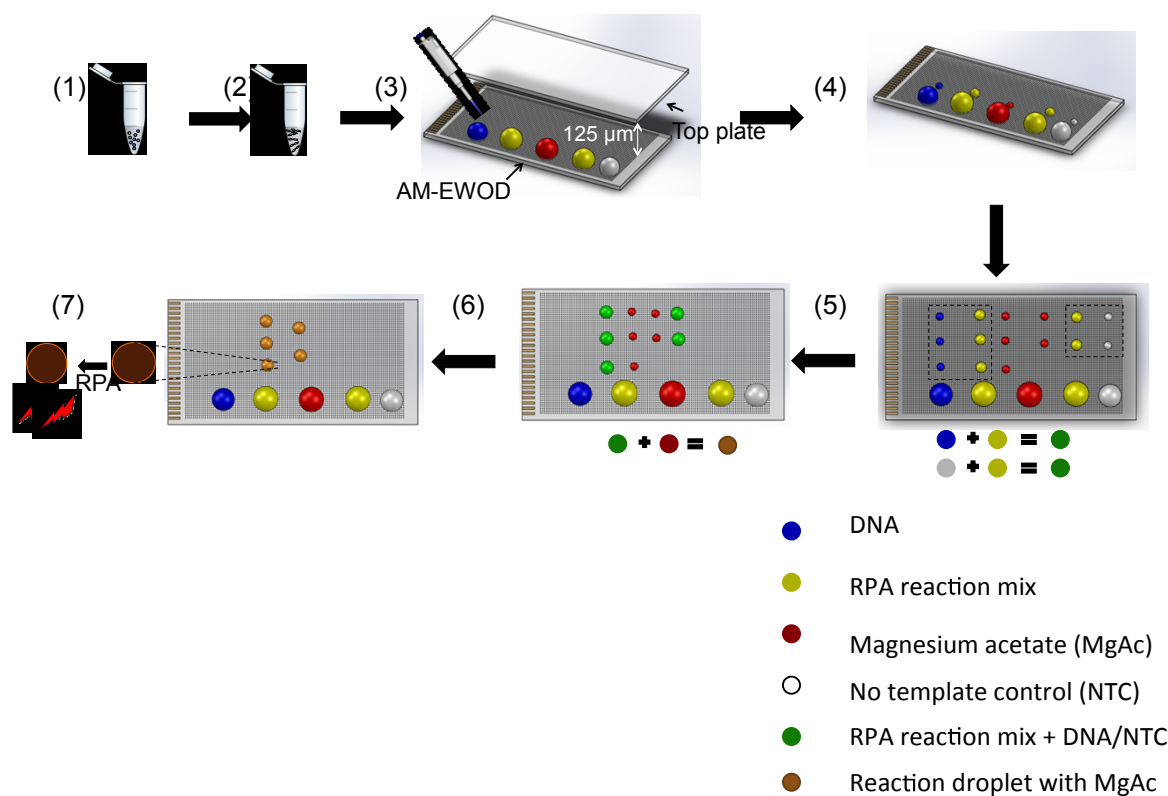

ESI, Figure 1: (a) Schematic representation of the protocol for implementing the RPA assay on AM-EWOD device. An *E.coli* suspension is prepared (1), from which DNA containing *bla*<sub>CTX-M-15</sub> (2) is extracted. DNA sample, RPA reaction mix, magnesium acetate and no template control (NTC) is pipetted onto array elements (3). Daughter droplets are dispensed from the reagent droplets (4). DNA and NTC is mixed with dispensed RPA reaction mix daughter droplets (5) and DNA-RPA reaction mix droplets are moved to the fluorescence detection position on EWOD (6). Magnesium acetate is mixed with the DNA-RPA reaction mix droplets to initiate the RPA reaction and the device heated to 39°C (7). Real-time fluorescence is measured using custom-made optical setup, while continuously mixing the reaction droplets.

| Reagent           | Droplet volume programmed (nL) | Average volume dispensed (nL) | Standard deviation | CV (%) | Error in dispensing (%) |
|-------------------|--------------------------------|-------------------------------|--------------------|--------|-------------------------|
| Water             | 45                             | 46.55                         | 0.094              | 1.01   | 3.4                     |
|                   | 80                             | 84.1                          | 0.29               | 1.73   | 5.1                     |
|                   | 125                            | 114.72                        | 0.31               | 1.37   | 8                       |
|                   | 180                            | 168.15                        | 0.194              | 0.57   | 6.5                     |
| Magnesium acetate | 45                             | 44.9                          | 0.082              | 0.91   | 0.2                     |
|                   | 80                             | 82.95                         | 0.089              | 0.53   | 3.6                     |
|                   | 125                            | 121                           | 0.106              | 0.44   | 3.2                     |
|                   | 180                            | 176                           | 1.26               | 3.59   | 2.2                     |
| RPA reaction mix  | 45                             | 46.5                          | 0.08               | 0.92   | 3.3                     |
|                   | 80                             | 77                            | 0.17               | 1.15   | 3.7                     |
|                   | 125                            | 120.7                         | 0.52               | 2.17   | 3.4                     |
|                   | 180                            | 167.6                         | 0.786              | 2.34   | 6.8                     |

ESI, Table 1: Error (%) and CV (%) in dispensing 15 daughter droplets from a reservoir pad for a given programmed volume and reagent (droplets removed and then returned to the reservoir). All the reagents (water, magnesium acetate and RPA reaction mix) contain 0.1% Tween® 20.
